# Supplementary material
Source: PubMed Central journal article supplement (PMC1182488)
Supplement: plntcell_tpc.105.032623_1.pdf [file plntcell_tpc.105.032623_1.pdf]

## Supplement1

| construct               | # primary transformants analyzed | % of GUS positive transformants |
|-------------------------|----------------------------------|---------------------------------|
| <i>HindBst</i>          | 59                               | 9                               |
| <i>FspBst</i>           | 50                               | 72                              |
| <i>ApaBst</i>           | 50                               | 74                              |
| <i>ScaBst</i>           | 50                               | 46                              |
| $\Delta 1$              | 18                               | 39                              |
| $\Delta 2$              | 23                               | 57                              |
| $\Delta 3$              | 48                               | 38                              |
| $\Delta 4$              | 27                               | 48                              |
| $\Delta 5$              | 38                               | 40                              |
| $\Delta 51$             | 66                               | 49                              |
| $\Delta 52$             | 48                               | 35                              |
| $\Delta 53$             | 30                               | 50                              |
| $\Delta 54$             | 48                               | 58                              |
| $\Delta 55$             | 48                               | 58                              |
| <i>S2-HindBst</i>       | 45                               | 56                              |
| <i>S3-HindBst</i>       | 64                               | 27                              |
| <i>S5-HindBst</i>       | 72                               | 35                              |
| <i>M31-HindBst</i>      | 118                              | 31                              |
| <i>M32-HindBst</i>      | 48                               | 42                              |
| <i>M33-HindBst</i>      | 48                               | 35                              |
| <i>M51-HindBst</i>      | 37                               | 27                              |
| <i>M52HindBst</i>       | 48                               | 50                              |
| <i>M53-HindBst</i>      | 48                               | 42                              |
|                         |                                  |                                 |
| <i>(D5)<sub>1</sub></i> | 10                               | 0                               |
| <i>(D5)<sub>3</sub></i> | 100                              | 5                               |
| <i>(D5)<sub>4</sub></i> | 48                               | 15                              |
| <i>(G1)<sub>4</sub></i> | 48                               | 15                              |
| <i>(G2)<sub>4</sub></i> | 48                               | 10                              |
| <i>(G3)<sub>4</sub></i> | 48                               | 17                              |
| <i>(G4)<sub>4</sub></i> | 48                               | 6                               |
| <i>(G5)<sub>4</sub></i> | 48                               | 0                               |
| <i>(G6)<sub>4</sub></i> | 48                               | 0                               |
| <i>(G7)<sub>4</sub></i> | 96                               | 0                               |
| <i>(G8)<sub>4</sub></i> | 96                               | 0                               |
| <i>(L2)<sub>4</sub></i> | 48                               | 21                              |
| <i>(L3)<sub>4</sub></i> | 48                               | 0                               |
| <i>(L4)<sub>4</sub></i> | 48                               | 0                               |
| <i>(L5)<sub>4</sub></i> | 48                               | 29                              |
| <i>(L6)<sub>4</sub></i> | 48                               | 0                               |
| <i>(S0)<sub>4</sub></i> | 103                              | 13                              |
